H. KLOSTERHALFEN (Hrsg.): **Antibakterielle Chemotherapie in der Urologie**. 3. Norddeutsche Therapiesprache, Schneverdingen 1972. Mit Beiträgen von G. BÄUMLE, F. KLASCHKA, P. NAUMANN, M. PLEMPER, F. TRUSS, W. VAHLENSIECK, A. ZIMMERMANN. Thieme, Stuttgart 1973. VIII + 64 pp., 33 fig., 9 tab., 1 Farbtafel; DM 15.80. ISBN 3-13-5100-01-4.

In einem kleinen, übersichtlich gestalteten Band sind die Hauptreferate der 3. Norddeutschen Therapiesprache über die Grundlagen der antibakteriellen Chemotherapie zusammengefasst.

Eingangs werden Wirkungsmechanismus und Pharmakokinetik als Grundlagen gezielter erfolgversprechender Chemotherapie besprochen. Auf die Pathogenese, Art und Therapie unerwünschter Wirkungen von Antibiotika und sonstiger, in der Urologie verwendeter Substanzen wird in einem weiteren Kapitel eingegangen. Über die Bedeutung der Antibiotika bezüglich Wundheilung wird anhand tierexperimenteller Untersuchungen an der Ratte berichtet. Abschliessend werden drei aktuelle klinische Probleme behandelt: die hochdosierte antibakterielle Chemotherapie in der Urologie, die lokale Behandlung von Blaseninfektionen durch Spülungen und der Hefebefall der Harnwege.

Zusammenfassend: Das kleine Buch vermittelt wertvolle Informationen über neueste Aspekte und bekannte klinische Probleme der antibakteriellen Chemotherapie.

H. J. LEISINGER, Zürich

P. DEUTICKE und T. LAUBENBERGER: **Die Röntgenuntersuchung der Niere und des Harnleiters in der urologischen Diagnostik**. 2., wesentlich erweiterte und ergänzte Aufl.; XVI+836 pp., 563 fig., Literaturverzeichnisse, Sachregister. DM 310.—.

Ziemlich genau 10 Jahre nach dem Erscheinen der hervorragenden 1. Auflage dieses Werkes von DEUTICKE kommt jetzt eine zweite, wesentlich erweiterte und ergänzte Auflage in Zusammenarbeit mit T. LAUBENBERGER zum Verkauf. In dieser Neuerscheinung, die unter anderem die neuesten diagnostischen Verfahren, wie die nuklearmedizinischen Methoden, die selektiven Angiographien und die Lymphographien beschreibt, kann man sich überzeugen, dass glücklicherweise die ausgezeichnete und persönliche Darstellung der 1. Auflage von DEUTICKE durch diese Neubearbeitung nicht wesentlich geändert worden ist. Diese 2. Auflage entspricht den heutigen Bedürfnissen – sie ist funktionell und technisch orientiert, behält aber die Grundlagen der grossen klinischen Erfahrung von DEUTICKE. Die Verbesserung der Qualität des Kontrastmittels hat die Ausscheidungsurographie in den Vordergrund gestellt. Die retrograde Füllung ist dadurch in den Hintergrund getreten, jedoch behält sie ihre Anwendung unter präziser Indikation und ist immer noch bei verschie-

denen Fällen als unentbehrlich zu betrachten. Zurzeit besteht kein ähnliches Werk, das die gemeinsamen Probleme der Urologie und Radiologie so gut zur Darstellung bringt und gleichzeitig die Fortschritte der radiologischen Technik unter Beibehaltung der klinischen Symptomatologie der verschiedenen urologischen Erkrankungen aufzeigt. Die Urologen werden in der Zeit der zunehmenden Ver technisierung der Medizin dieses Werk besonders schätzen, sie finden in diesem Buch alle ihnen zur Verfügung stehenden radiodiagnostischen Massnahmen, indem Indikation, Technik, Gefahren und Beurteilung von allen Methoden genau dargestellt sind.

G. MAYOR, Zürich

L. G. WESSON and G. M. FANELLI: **Recent Advances in Renal Physiology and Pharmacology**. Medical and Technical Publ. Co., Lancaster 1974. 388 pp.; £ 11.00.

Das vorliegende Buch ist eine Zusammenstellung der wissenschaftlichen Beiträge des 15. Alfred-Newton-Richard-Symposiums, welches im Mai 1973 in Philadelphia, Pa., stattfand.

26 Autoren, bekannte Spezialisten ihres Fachgebietes, berichten über pharmakologische und biochemische Aspekte der Nierenphysiologie. Im Speziellen werden die renalen Transportmechanismen und biochemischen Zellvorgänge verschiedener Substanzen besprochen. Die Bedeutung und technische Entwicklung der Mikropunktionsuntersuchung werden besonders hervorgehoben. Für den Kliniker stehen vor allem die Arbeiten Renin-Angiotensin-Mechanismus sowie die Kapitel über die Diuretika im Vordergrund.

Die verschiedenen Beiträge vermitteln keine allgemeine Übersicht über die Physiologie und Pharmakologie der Niere, sondern behandeln engumschriebene physiologische, biochemische und pharmakologische Probleme der Nierenfunktion. Fragestellung, Methodik, Resultate und Diskussion werden in den einzelnen Artikeln klar und verständlich präsentiert.

Das Buch ist für den wissenschaftlich und experimentell tätigen Mediziner wegen seiner Dokumentation und Literaturangaben sicher eine Fundgrube. Dem klinisch interessierten Nephrologen und Urologen gibt es Hinweise auf neue wissenschaftliche Untersuchungen und zahlreiche aktuelle Fragestellungen in der Nierenphysiologie.

H. J. LEISINGER, Zürich
